# Supplementary material
Source: Springer Nature journal article supplement (https://www.springermedizin.de/resource/supplementary/12874_2012_880_MOESM2_ESM.pdf/9432782)

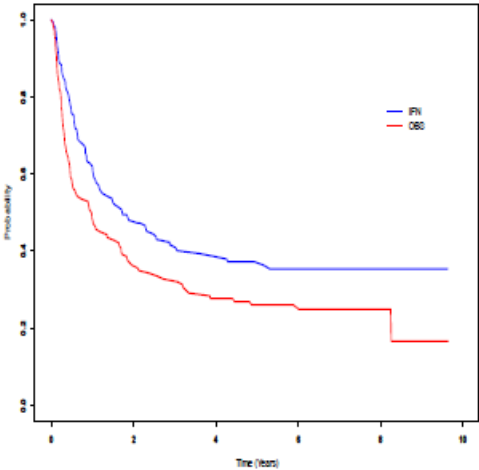

(a) RFS for E1684

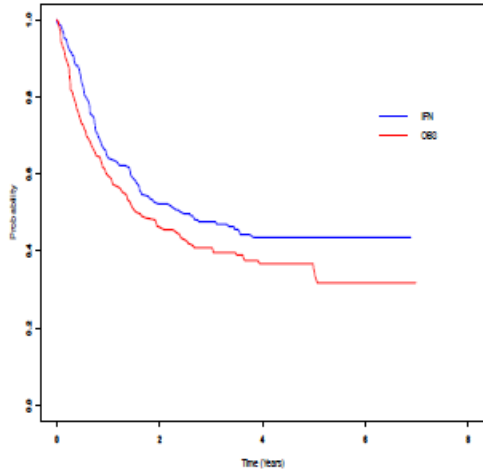

(b) RFS for E1690

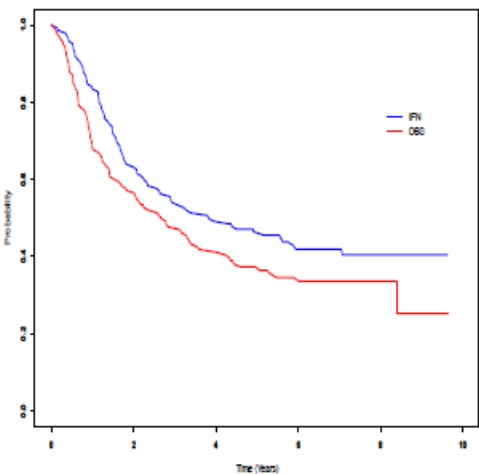

(c) OS for E1684

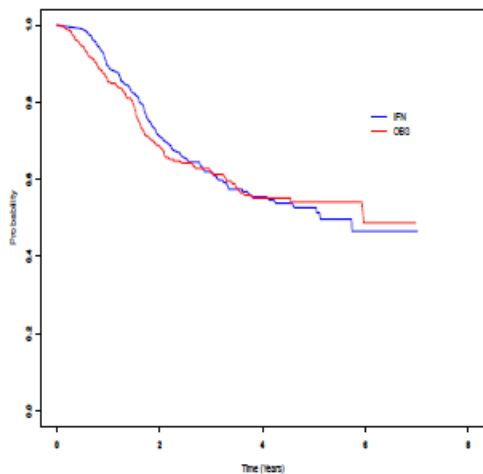

(d) OS for E1690

Supplement: MOESM2 [file 9432782]
